# Supplementary material
Source: publisher figshare collection journal article supplement (https://plos.figshare.com/articles/dataset/_/7050239)
Supplement: Supplementary file 1 [file 1 › pone.0202489.s001.pdf]

**S1 Table. Descriptives of the ELSA and Whitehall II-sample**

|                                        | Range        | Study 1       | Study 2       |
|----------------------------------------|--------------|---------------|---------------|
| <i>Independent variables</i>           |              |               |               |
| <b>Material Class</b>                  |              |               |               |
| Higher Class (Ref.)                    | 0/1          | 1345 (37.49%) | 2802 (44.65%) |
| Middle Class                           | 0/1          | 1242 (34.61%) | 2737 (43.62%) |
| Working Class                          | 0/1          | 1001 (27.90%) | 736 (11.73%)  |
| <b>Gender</b>                          |              |               |               |
| Male (Ref.)                            | 0/1          | 1648 (45.93%) | 4538 (72.32%) |
| Female                                 | 0/1          | 1940 (54.07%) | 1737 (27.68%) |
| <b>Education</b>                       |              |               |               |
| No post-secondary education (Ref.)     | 0/1          | 2980 (83.05%) | 4031 (64.24%) |
| Post-secondary education               | 0/1          | 608 (16.95%)  | 2244 (35.76%) |
| <b>Subjective Social Status Groups</b> |              |               |               |
| Higher Status                          | 0/1          | 1378 (38.41%) | 2048 (32.64%) |
| Middle Status                          | 0/1          | 986 (27.48%)  | 2327 (37.08%) |
| Lower Status                           | 0/1          | 1224 (34.11%) | 1900 (30.28%) |
| <b>Marital Status</b>                  |              |               |               |
| Married (Ref.)                         | 0/1          | 2370 (66.05%) | 4958 (79.01%) |
| Unmarried                              | 0/1          | 1218 (33.95%) | 1317 (20.99%) |
| <b>Class-Status Combinations</b>       |              |               |               |
| Higher class-Higher status (Ref.)      | 0/1          | 751 (20.93%)  | 1596 (25.43%) |
| Higher class-Middle status             | 0/1          | 337 (9.39%)   | 992 (15.81%)  |
| Higher class-Lower status              | 0/1          | 257 (7.16%)   | 214 (3.41%)   |
| Middle class-Higher status             | 0/1          | 405 (11.29%)  | 416 (6.63%)   |
| Middle class-Middle status             | 0/1          | 385 (10.73%)  | 1179 (18.79%) |
| Middle class-Lower status              | 0/1          | 452 (12.60%)  | 1142 (18.20%) |
| Working class-Higher status            | 0/1          | 222 (6.19%)   | 36 (0.57%)    |
| Working class-Middle status            | 0/1          | 264 (7.36%)   | 156 (2.49%)   |
| Working class-Lower status             | 0/1          | 515 (14.35%)  | 544 (8.67%)   |
| <b>Taking cholesterol medication</b>   |              |               |               |
| No (Ref.)                              | 0/1          | 3310 (92.25%) |               |
| Yes                                    | 0/1          | 278 (7.75%)   |               |
| <b>Age</b>                             | 60-90/45-69/ | 71.51 (7.88)  | 55.78 (6.01)  |
| <b>Subjective Status</b>               | 100-5/10-0.5 | 42.09 (16.33) | 4.58 (1.61)   |
| <i>Dependent variables</i>             |              |               |               |
| <b>Health</b>                          | 0-5          | 1.76 (1.04)   |               |
| <b>Health lifestyle</b>                | 0-7          |               | 2.506 (1.07)  |
| <b>Too little exercise/week</b>        |              |               |               |
| No (Ref.)                              | 0/1          |               | 525 (8.37%)   |
| Yes                                    | 0/1          |               | 5750 (91.63%) |
| <b>Too much alcohol/week</b>           |              |               |               |
| No (Ref.)                              | 0/1          |               | 4640 (74.50%) |
| Yes                                    | 0/1          |               | 1588 (25.50%) |
| <b>Too much wine/week</b>              |              |               |               |
| No (Ref.)                              | 0/1          |               | 5940 (95.38%) |
| Yes                                    | 0/1          |               | 288 (4.62%)   |
| <b>Too much beer/week</b>              |              |               |               |
| No (Ref.)                              | 0/1          |               | 6023 (96.71%) |
| Yes                                    | 0/1          |               | 205 (3.29%)   |

|                                            |     |               |               |
|--------------------------------------------|-----|---------------|---------------|
| <b>Eating whole wheat bread</b>            |     |               |               |
| No (Ref.)                                  | 0/1 |               | 2373 (38.32%) |
| Yes                                        | 0/1 |               | 3819 (61.68%) |
| <b>Eating daily fruits and vegetables</b>  |     |               |               |
| No (Ref.)                                  | 0/1 |               | 4604 (74.10%) |
| Yes                                        | 0/1 |               | 1609 (25.90%) |
| <b>Smoking</b>                             |     |               |               |
| No (Ref.)                                  | 0/1 |               | 5621 (90.02%) |
| Yes                                        | 0/1 |               | 623 (9.98%)   |
| <b>Systolic blood pressure</b>             |     |               |               |
| Not too high (Ref.)                        | 0/1 | 1474 (42.75%) |               |
| Too high                                   | 0/1 | 1974 (57.25%) |               |
| <b>Diastolic blood pressure</b>            |     |               |               |
| Not too high (Ref.)                        | 0/1 | 2017 (58.50%) |               |
| Too high                                   | 0/1 | 1431 (41.50%) |               |
| <b>Cholesterol</b>                         |     |               |               |
| Not too high (Ref.)                        | 0/1 | 1786 (64.45%) |               |
| Too high                                   | 0/1 | 985 (35.55%)  |               |
| <b>Triglycerides</b>                       |     |               |               |
| Not too high (Ref.)                        | 0/1 | 2385 (88.04%) |               |
| Too high                                   | 0/1 | 324 (11.96%)  |               |
| <b>High sensitivity c-reactive protein</b> |     |               |               |
| Not too high (Ref.)                        | 0/1 | 1965 (72.51%) |               |
| Too high                                   | 0/1 | 745 (27.49%)  |               |
| <b>HDL-cholesterol</b>                     |     |               |               |
| Not too high (Ref.)                        | 0/1 | 2518 (92.25%) |               |
| Too high                                   | 0/1 | 191 (7.05%)   |               |

Source: Wave 2 and 6 of the English Longitudinal Study of Ageing & Wave 5 of the Whitehall II Study
