# Supplementary material
Source: publisher figshare collection journal article supplement (https://plos.figshare.com/articles/dataset/_/7050239)
Supplement: Supplementary file 1 [file 1 › pone.0202489.s002.pdf]

Confirmatory factor analysis on our index of health biomarkers shows that not all variables load in a single factor nor is there a clear structure of several underlying factors, except for the two measurements of blood pressure loading similarly, while the Cronbach's alpha is 0.48. Since this illustrates that the several health biomarkers are not strongly related to each other, we present the following separate analyses on each of the biomarkers to further show how material class and subjective social status are associated with health outcomes.

**S2 Table. Material Class and Subjective Social Status regressed on the separate health biomarkers with control variables**

| <b>Systolic blood pressure<br/>(N: 3448)</b> | 1A              | 1B              | 1C              | 1D              | 1E              |
|----------------------------------------------|-----------------|-----------------|-----------------|-----------------|-----------------|
| <b>Constant</b>                              | 0.020 (0.01)*** | 0.015 (0.01)*** | 0.019 (0.01)*** | 0.036 (0.02)*** | 0.019 (0.01)*** |
| <b>Material Class</b>                        |                 |                 |                 |                 |                 |
| Higher class (Ref.)                          | -               | -               | -               | -               | -               |
| Middle class                                 | 1.016 (0.09)    | 0.983 (0.09)    | 0.987 (0.09)    | 0.740 (0.27)    | -               |
| Working class                                | 1.193 (0.12)*   | 1.115 (0.11)    | 1.131 (0.11)    | 1.181 (0.42)    | -               |
| <b>Gender</b>                                |                 |                 |                 |                 |                 |
| Male (Ref.)                                  | -               | -               | -               | -               | -               |
| Female                                       | 0.745 (0.06)*** | 0.750 (0.06)*** | 0.749 (0.06)*** | 0.747 (0.06)**  | 0.743 (0.06)*** |
| <b>Education</b>                             |                 |                 |                 |                 |                 |
| Lower education (Ref.)                       | -               | -               | -               | -               | -               |
| Post-secondary education                     | 0.780 (0.08)*   | 0.826 (0.09)    | 0.812 (0.09)*   | 0.824 (0.09)    | 0.811 (0.09)*   |
| <b>Marital Status</b>                        |                 |                 |                 |                 |                 |
| Married (Ref.)                               | -               | -               | -               | -               | -               |
| Not-married                                  | 1.111 (0.09)    | 1.075 (0.09)    | 1.087 (0.09)    | 1.075 (0.08)    | 1.083 (0.09)    |
| <b>Age</b>                                   | 1.063 (0.00)*** | 1.063 (0.01)*** | 1.062 (0.01)*** | 1.063 (0.01)*** | 1.062 (0.01)*** |
| <b>Decreasing Subjective Status</b>          |                 | 1.007 (0.00)**  |                 | 1.008 (0.00)*   |                 |
| <b>Subjective Status Groups</b>              |                 |                 |                 |                 |                 |
| Higher status (Ref.)                         |                 |                 | -               |                 |                 |
| Middle status                                |                 |                 | 1.097 (0.10)    |                 |                 |
| Lower status                                 |                 |                 | 1.231 (0.11)*   |                 |                 |
| <b>Material Class X Subjective Status</b>    |                 |                 |                 |                 |                 |
| Higher X Subj status (Ref.)                  |                 |                 |                 | -               |                 |
| Middle X Subj Status                         |                 |                 |                 | 0.995 (0.01)    |                 |
| Working X Subj Status                        |                 |                 |                 | 1.001 (0.01)    |                 |
| <b>Class-Status Combinations</b>             |                 |                 |                 |                 |                 |
| Higher class-Higher status (Ref.)            |                 |                 |                 |                 | -               |
| Higher class-Middle status                   |                 |                 |                 |                 | 1.051 (0.15)    |
| Higher class-Lower status                    |                 |                 |                 |                 | 1.452 (0.23)*   |
| Middle class-Higher status                   |                 |                 |                 |                 | 1.104 (0.15)    |
| Middle class-Middle status                   |                 |                 |                 |                 | 1.178 (0.17)    |
| Middle class-Lower status                    |                 |                 |                 |                 | 1.074 (0.14)    |
| Working class-Higher status                  |                 |                 |                 |                 | 1.036 (0.17)    |
| Working class-Middle status                  |                 |                 |                 |                 | 1.249 (0.20)    |

|                                                                        |                 |                 |                 |                 |                 |
|------------------------------------------------------------------------|-----------------|-----------------|-----------------|-----------------|-----------------|
| Working class-Lower status                                             |                 |                 |                 |                 | 1.507 (0.20)**  |
| <b>Karlson, Holm, Breen-Mediation Analysis</b>                         |                 |                 |                 |                 |                 |
| <b>% of Material social class mediated by Subjective social status</b> |                 |                 |                 |                 |                 |
| Higher Class                                                           |                 | -               | -               |                 |                 |
| Middle Class                                                           |                 | 210.54%*        | 187.99%*        |                 |                 |
| Working Class                                                          |                 | 38.51%**        | 29.76%*         |                 |                 |
| <b>Diastolic blood pressure (N:3448)</b>                               | 2A              | 2B              | 2C              | 2D              | 2E              |
| <b>Constant</b>                                                        | 0.024 (0.01)*** | 0.037 (0.01)*** | 0.023 (0.01)*** | 0.040 (0.02)*** | 0.023 (0.01)*** |
| <b>Material Class</b>                                                  |                 |                 |                 |                 |                 |
| Higher class (Ref.)                                                    | -               | -               | -               | -               | -               |
| Middle class                                                           | 1.038 (0.09)    | 1.017 (0.09)    | 1.020 (0.09)    | 0.735 (0.27)    |                 |
| Working class                                                          | 1.280 (0.12)**  | 1.227 (0.12)*   | 1.235 (0.12)*   | 0.862 (0.30)    |                 |
| <b>Gender</b>                                                          |                 |                 |                 |                 |                 |
| Male (Ref.)                                                            | -               | -               | -               | -               | -               |
| Female                                                                 | 0.733 (0.05)*** | 0.738 0.05)***  | 0.738 (0.05)*** | 0.733 (0.05)*** | 0.733 (0.05)*** |
| <b>Education</b>                                                       |                 |                 |                 |                 |                 |
| Lower education (Ref.)                                                 | -               | -               | -               | -               | -               |
| Post-secondary education                                               | 0.916 (0.10)    | 0.950 (0.10)    | 0.936 (0.10)    | 0.966 (0.11)    | 0.944 (0.10)    |
| <b>Marital Status</b>                                                  |                 |                 |                 |                 |                 |
| Married (Ref.)                                                         | -               | -               | -               | -               | -               |
| Not-married                                                            | 1.215 (0.10)*   | 1.191 (0.09)*   | 1.197 (0.10)*   | 1.194 (0.10)*   | 1.194 (0.10)*   |
| <b>Age</b>                                                             | 1.049 (0.00)*** | 1.049 (0.00)*** | 1.049 (0.00)*** | 1.049 (0.00)*** | 1.049 0.00)***  |
| <b>Decreasing Subjective Status</b>                                    |                 | 1.004 (0.00)    |                 | 1.008 (0.00)    |                 |
| <b>Subjective Status Groups</b>                                        |                 |                 |                 |                 |                 |
| Higher status (Ref.)                                                   |                 |                 | -               |                 |                 |
| Middle status                                                          |                 |                 | 1.010 (0.09)    |                 |                 |
| Lower status                                                           |                 |                 | 1.144 (0.10)    |                 |                 |
| <b>Material Class X Subjective Status</b>                              |                 |                 |                 |                 |                 |
| Higher X Subj status (Ref.)                                            |                 |                 |                 | -               |                 |
| Middle X Subj Status                                                   |                 |                 |                 | 0.995 (0.01)    |                 |
| Working X Subj Status                                                  |                 |                 |                 | 0.994 (0.01)    |                 |
| <b>Class-Status Combinations</b>                                       |                 |                 |                 |                 |                 |
| Higher class-Higher status (Ref.)                                      |                 |                 |                 |                 | -               |
| Higher class-Middle status                                             |                 |                 |                 |                 | 0.946 (0.14)    |
| Higher class-Lower status                                              |                 |                 |                 |                 | 1.442 (0.23)*   |
| Middle class-Higher status                                             |                 |                 |                 |                 | 1.122 (0.15)    |
| Middle class-Middle status                                             |                 |                 |                 |                 | 1.145 (0.16)    |
| Middle class-Lower status                                              |                 |                 |                 |                 | 1.074 (0.15)    |
| Working class-Higher status                                            |                 |                 |                 |                 | 1.249 (0.21)    |
| Working class-Middle status                                            |                 |                 |                 |                 | 1.313 (0.21)    |
| Working class-Lower status                                             |                 |                 |                 |                 | 1.464 (0.19)**  |
| <b>Karlson, Holm, Breen-Mediation Analysis</b>                         |                 |                 |                 |                 |                 |

|                                                                                                                         |                 |                       |                       |                 |                 |
|-------------------------------------------------------------------------------------------------------------------------|-----------------|-----------------------|-----------------------|-----------------|-----------------|
| <b>% of Material social class mediated by Subjective social status</b><br>Higher Class<br>Middle Class<br>Working Class |                 | -<br>54.48%<br>17.05% | -<br>50.13%<br>13.75% |                 |                 |
| <b>Cholesterol (N: 2771)</b>                                                                                            | 3A              | 3B                    | 3C                    | 3E              | 3E              |
| <b>Constant</b>                                                                                                         | 2.218 (0.90)*   | 2.474 (1.03)*         | 2.272 (0.92)*         | 2.417 (1.05)*   | 1.850 (0.80)    |
| <b>Material Class</b>                                                                                                   |                 |                       |                       |                 |                 |
| Higher class (Ref.)                                                                                                     | -               | -                     | -                     | -               |                 |
| Middle class                                                                                                            | 0.963 (0.10)    | 0.978 (0.10)          | 0.983 (0.10)          | 0.961 (0.41)    |                 |
| Working class                                                                                                           | 0.898 (0.10)    | 0.930 (0.11)          | 0.929 (0.11)          | 0.840 (0.34)    |                 |
| <b>Gender</b>                                                                                                           |                 |                       |                       |                 |                 |
| Male (Ref.)                                                                                                             | -               | -                     | -                     | -               | -               |
| Female                                                                                                                  | 2.391 (0.21)*** | 2.387 (0.21)***       | 2.39 (0.21)***        | 2.386 (0.21)*** | 2.385 (0.21)*** |
| <b>Education</b>                                                                                                        |                 |                       |                       |                 |                 |
| Lower education (Ref.)                                                                                                  | -               | -                     | -                     | -               | -               |
| Post-secondary education                                                                                                | 1.017 (0.12)    | 0.990 (0.12)          | 0.987 (0.12)          | 0.995 (0.12)    | 1.000 (0.12)    |
| <b>Marital Status</b>                                                                                                   |                 |                       |                       |                 |                 |
| Married (Ref.)                                                                                                          | -               | -                     | -                     | -               | -               |
| Not-married                                                                                                             | 0.833 (0.08) *  | 0.846 (0.08)          | 0.847 (0.07)          | 0.847 (0.07)    | 0.847 (0.08)    |
| <b>Age</b>                                                                                                              | 0.975 (0.01)*** | 0.975 (0.01)***       | 0.976 (0.01)***       | 0.975 (0.01)*** | 0.975 (0.00)*** |
| <b>Decreasing Subjective Status</b>                                                                                     |                 | 0.997 (0.00)          |                       | 0.997 (0.00)    |                 |
| <b>Subjective Status Groups</b>                                                                                         |                 |                       |                       |                 |                 |
| Higher status (Ref.)                                                                                                    |                 |                       | -                     |                 |                 |
| Middle status                                                                                                           |                 |                       | 0.877 (0.09)          |                 |                 |
| Lower status                                                                                                            |                 |                       | 0.878 (0.09)          |                 |                 |
| <b>Material Class X Subjective Status</b>                                                                               |                 |                       |                       |                 |                 |
| Higher X Subj status (Ref.)                                                                                             |                 |                       |                       | -               |                 |
| Middle X Subj Status                                                                                                    |                 |                       |                       | 1.000 (0.01)    |                 |
| Working X Subj Status                                                                                                   |                 |                       |                       | 1.002 (0.01)    |                 |
| <b>Class-Status Combinations</b>                                                                                        |                 |                       |                       |                 |                 |
| Higher class-Higher status (Ref.)                                                                                       |                 |                       |                       |                 | -               |
| Higher class-Middle status                                                                                              |                 |                       |                       |                 | 1.024 (0.16)    |
| Higher class-Lower status                                                                                               |                 |                       |                       |                 | 0.968 (0.18)    |
| Middle class-Higher status                                                                                              |                 |                       |                       |                 | 1.098 (0.17)    |
| Middle class-Middle status                                                                                              |                 |                       |                       |                 | 0.844 (0.14)    |
| Middle class-Lower status                                                                                               |                 |                       |                       |                 | 0.936 (0.15)    |
| Working class-Higher status                                                                                             |                 |                       |                       |                 | 1.084 (0.21)    |
| Working class-Middle status                                                                                             |                 |                       |                       |                 | 0.858 (0.16)    |
| Working class-Lower status                                                                                              |                 |                       |                       |                 | 0.837 (0.13)    |
| <b>Karlson, Holm, Breen-Mediation Analysis</b>                                                                          |                 |                       |                       |                 |                 |
| <b>% of Material social class mediated by Subjective social status</b><br>Higher Class<br>Middle Class<br>Working Class |                 | -<br>43.02%<br>32.48% | -<br>52.22%<br>34.07% |                 |                 |

| <b>Triglycerides (N: 2709)</b>                                         | 4A            | 4B            | 4C            | 4D            | 4E             |
|------------------------------------------------------------------------|---------------|---------------|---------------|---------------|----------------|
| <b>Constant</b>                                                        | 0.655 (0.37)  | 0.289 (0.18)* | 0.384 (0.23)  | 0.230 (0.15)* | 0.360 (0.22)   |
| <b>Material Class</b>                                                  |               |               |               |               |                |
| Higher class (Ref.)                                                    | -             | -             | -             | -             |                |
| Middle class                                                           | 1.138 (0.17)  | 1.080 (0.16)  | 1.078 (0.16)  | 1.671 (0.67)  |                |
| Working class                                                          | 1.017 (0.17)  | 0.914 (0.15)  | 0.922 (0.16)  | 1.283 (0.59)  |                |
| <b>Gender</b>                                                          |               |               |               |               |                |
| Male (Ref.)                                                            | -             | -             | -             | -             | -              |
| Female                                                                 | 0.798 (0.10)* | 0.807 (0.10)  | 0.807 (0.10)  | 0.798 (0.10)  | 0.796 (0.10)   |
| <b>Education</b>                                                       |               |               |               |               |                |
| Lower education (Ref.)                                                 | -             | -             | -             | -             | -              |
| Post-secondary education                                               | 0.635 (0.12)* | 0.691 (0.13)  | 0.675 0.13)*  | 0.710 (0.14)  | 1.341 (0.27)   |
| <b>Marital Status</b>                                                  |               |               |               |               |                |
| Married (Ref.)                                                         | -             | -             | -             | -             | -              |
| Not-married                                                            | 1.074 (0.14)  | 1.022 (0.14)  | 1.032 (0.14)  | 1.022 (0.14)  | 1.028 (0.14)   |
| <b>Cholesterol medication</b>                                          |               |               |               |               |                |
| No (Ref.)                                                              | -             | -             | -             | -             | -              |
| Yes                                                                    | 1.337 (0.27)  | 1.351 (0.27)  | 1.344 (0.27)  | 1.363 (0.27)  | 1.341 (0.27)   |
| <b>Age</b>                                                             | 0.986 (0.01)  | 0.985 (0.01)  | 0.985 (0.01)  | 0.985 (0.01)  | 0.985 (0.01)   |
| <b>Decreasing Subjective Status</b>                                    |               | 1.010 (0.00)* |               | 1.017 (0.01)* |                |
| <b>Subjective Status Groups</b>                                        |               |               |               |               |                |
| Higher status (Ref.)                                                   |               |               | -             |               |                |
| Middle status                                                          |               |               | 1.109 (0.18)  |               |                |
| Lower status                                                           |               |               | 1.412 (0.21)* |               |                |
| <b>Material Class X Subjective Status</b>                              |               |               |               |               |                |
| Higher X Subj status (Ref.)                                            |               |               |               | -             |                |
| Middle X Subj Status                                                   |               |               |               | 0.989 (0.01)  |                |
| Working X Subj Status                                                  |               |               |               | 0.992 (0.01)  |                |
| <b>Class-Status Combinations</b>                                       |               |               |               |               |                |
| Higher class-Higher status (Ref.)                                      |               |               |               |               | -              |
| Higher class-Middle status                                             |               |               |               |               | 1.019 (0.27)   |
| Higher class-Lower status                                              |               |               |               |               | 2.072 (0.51)** |
| Middle class-Higher status                                             |               |               |               |               | 1.337 (0.31)   |
| Middle class-Middle status                                             |               |               |               |               | 1.345 (0.32)   |
| Middle class-Lower status                                              |               |               |               |               | 1.451 (0.33)   |
| Working class-Higher status                                            |               |               |               |               | 0.948 (0.30)   |
| Working class-Middle status                                            |               |               |               |               | 1.272 (0.35)   |
| Working class-Lower status                                             |               |               |               |               | 1.359 (0.31)   |
| <b>Karlson, Holm, Breen-Mediation Analysis</b>                         |               |               |               |               |                |
| <b>% of Material social class mediated by Subjective social status</b> |               |               |               |               |                |
| Higher Class                                                           |               | -             | -             |               |                |
| Middle Class                                                           |               | 38.16%*       | 41.58%        |               |                |
| Working Class                                                          |               | 813.26%*      | 622.26%       |               |                |
| <b>High sensitivity c-reactive protein (N: 2710)</b>                   | 5A            | 5B            | 5C            | 5D            | 5E             |

|                                                                        |                 |                 |                 |                 |                 |
|------------------------------------------------------------------------|-----------------|-----------------|-----------------|-----------------|-----------------|
| <b>Constant</b>                                                        | 0.0 (0.04)***   | 0.124 (0.06)*** | 0.085 (0.04)*** | 0.062 (0.03)*** | 0.084 (0.04)*** |
| <b>Material Class</b>                                                  |                 |                 |                 |                 |                 |
| Higher class (Ref.)                                                    | -               | -               | -               | -               | -               |
| Middle class                                                           | 1.207 (0.13)    | 1.177 (0.13)    | 1.182 (0.13)    | 1.647 (0.49)    |                 |
| Working class                                                          | 1.342 (0.16)*   | 1.271 (0.15)*   | 1.291 (0.16)*   | 1.574 (0.51)    |                 |
| <b>Gender</b>                                                          |                 |                 |                 |                 |                 |
| Male (Ref.)                                                            | -               | -               | -               | -               | -               |
| Female                                                                 | 1.197 (0.11)*   | -1.204 (0.11)*  | 1.201 (0.11)*   | 1.194 (0.11)    | 1.198 (0.11)*   |
| <b>Education</b>                                                       |                 |                 |                 |                 |                 |
| Lower education (Ref.)                                                 | -               | -               | -               | -               | -               |
| Post-secondary education                                               | 0.641 (0.09)**  | 0.670 (0.10)**  | 0.658 (0.09)**  | 0.681 (0.10)**  | 0.667 (0.10)**  |
| <b>Marital Status</b>                                                  |                 |                 |                 |                 |                 |
| Married (Ref.)                                                         | -               | -               | -               | -               | -               |
| Not-married                                                            | 1.154 (0.11)    | 1.125 (0.11)    | 1.137 (0.11)    | 1.125 (0.11)    | 1.133 (0.11)    |
| <b>Cholesterol medication</b>                                          |                 |                 |                 |                 |                 |
| No (Ref.)                                                              | -               | -               | -               | -               | -               |
| Yes                                                                    | 0.970 (0.16)    | 0.976 (0.16)    | 0.974 (0.16)    | 0.982 (0.16)    | 0.667 (0.10)**  |
| <b>Age</b>                                                             | 1.018 (0.01) ** | 1.017 (0.01)**  | 1.017 (0.01)**  | 1.018 (0.01)**  | 1.017 (0.01)**  |
| <b>Decreasing Subjective Status</b>                                    |                 | 1.005 (0.00)    |                 | 1.010 (0.01)*   |                 |
| <b>Subjective Status Groups</b>                                        |                 |                 |                 |                 |                 |
| Higher status (Ref.)                                                   |                 |                 | -               |                 |                 |
| Middle status                                                          |                 |                 | 1.071 (0.12)    |                 |                 |
| Lower status                                                           |                 |                 | 1.153 (0.13)    |                 |                 |
| <b>Material Class X Subjective Status</b>                              |                 |                 |                 |                 |                 |
| Higher X Subj status (Ref.)                                            |                 |                 |                 | -               |                 |
| Middle X Subj Status                                                   |                 |                 |                 | 0.991 (0.01)    |                 |
| Working X Subj Status                                                  |                 |                 |                 | 0.994 (0.01)    |                 |
| <b>Class-Status Combinations</b>                                       |                 |                 |                 |                 |                 |
| Higher class-Higher status (Ref.)                                      |                 |                 |                 |                 | -               |
| Higher class-Middle status                                             |                 |                 |                 |                 | 0.880 (0.17)    |
| Higher class-Lower status                                              |                 |                 |                 |                 | 1.433 (0.28)    |
| Middle class-Higher status                                             |                 |                 |                 |                 | 1.159 (0.20)    |
| Middle class-Middle status                                             |                 |                 |                 |                 | 1.411 (0.24)*   |
| Middle class-Lower status                                              |                 |                 |                 |                 | 1.262 (0.21)    |
| Working class-Higher status                                            |                 |                 |                 |                 | 1.321 (0.28)    |
| Working class-Middle status                                            |                 |                 |                 |                 | 1.452 (0.28)*   |
| Working class-Lower status                                             |                 |                 |                 |                 | 1.443 (0.23)*   |
| <b>Karlson, Holm, Breen-Mediation Analysis</b>                         |                 |                 |                 |                 |                 |
| <b>% of Material social class mediated by Subjective social status</b> |                 |                 |                 |                 |                 |
| Higher Class                                                           |                 | -               | -               |                 |                 |
| Middle Class                                                           |                 | 13.55%          | 11.32%          |                 |                 |
| Working Class                                                          |                 | 18.60%          | 13.30%          |                 |                 |
| <b>HDL-cholesterol (N: 2709)</b>                                       | 6A              | 6B              | 6C              | 6D              | 6E              |
| <b>Constant</b>                                                        | 0.158 (0.12) *  | 0.102 (0.08)    | 0.154 (0.12)*   | 0.076 (0.06)    | 0.141 (0.11)    |
| <b>Material Class</b>                                                  |                 |                 |                 |                 |                 |

|                                                                        |                 |                 |                 |                 |                 |
|------------------------------------------------------------------------|-----------------|-----------------|-----------------|-----------------|-----------------|
| Higher class (Ref.)                                                    | -               | -               | -               | -               | -               |
| Middle class                                                           | 1.277 (0.24)    | 1.164 (0.22)    | 1.192 (0.23)    | 2.329 (1.20)    |                 |
| Working class                                                          | 1.161 (0.25)    | 0.987 (0.22)    | 1.041 (0.23)    | 1.386 (0.86)    |                 |
| <b>Gender</b>                                                          |                 |                 |                 |                 |                 |
| Male (Ref.)                                                            | -               | -               | -               | -               | -               |
| Female                                                                 | 0.181 (0.03)*** | 0.183 (0.03)*** | 0.183 (0.03)*** | 0.181 (0.03)*** | 0.179 (0.03)*** |
| <b>Education</b>                                                       |                 |                 |                 |                 |                 |
| Lower education (Ref.)                                                 | -               | -               | -               | -               | -               |
| Post-secondary education                                               | 0.622 (0.15)*   | 0.708 (0.17)    | 0.667 (0.16)    | 0.734 (0.18)    | 0.691 (0.17)    |
| <b>Marital Status</b>                                                  |                 |                 |                 |                 |                 |
| Married (Ref.)                                                         | -               | -               | -               | -               | -               |
| Not-married                                                            | 1.282 (0.22)    | 1.200 (0.21)    | 1.231 (0.21)    | 1.195 (0.21)    | 1.226 (0.21)    |
| <b>Cholesterol medication</b>                                          |                 |                 |                 |                 |                 |
| No (Ref.)                                                              | -               | -               | -               | -               | -               |
| Yes                                                                    | 1.830 (0.43)*   | 1.873 (0.44)    | 1.84 (0.43)***  | 1.885 (0.44)**  | 1.815 (0.43)*   |
| <b>Age</b>                                                             | 0.996 (0.01)    | 0.995 (0.01)    | 0.995 (0.01)    | 0.977 (0.01)**  | 0.994 (0.01)    |
| <b>Decreasing Subjective Status</b>                                    |                 | 1.014 (0.01)**  |                 | 1.023 (0.01)**  |                 |
| <b>Subjective Status Groups</b>                                        |                 |                 |                 |                 |                 |
| Higher status (Ref.)                                                   |                 |                 | -               |                 |                 |
| Middle status                                                          |                 |                 | 1.120 (0.23)    |                 |                 |
| Lower status                                                           |                 |                 | 1.448 (0.28)    |                 |                 |
| <b>Material Class X Subjective Status</b>                              |                 |                 |                 |                 |                 |
| Higher X Subj status (Ref.)                                            |                 |                 |                 | -               |                 |
| Middle X Subj Status                                                   |                 |                 |                 | 0.983 (0.01)    |                 |
| Working X Subj Status                                                  |                 |                 |                 | 0.991 (0.01)    |                 |
| <b>Class-Status Combinations</b>                                       |                 |                 |                 |                 |                 |
| Higher class-Higher status (Ref.)                                      |                 |                 |                 |                 | -               |
| Higher class-Middle status                                             |                 |                 |                 |                 | 1.184 (0.39)    |
| Higher class-Lower status                                              |                 |                 |                 |                 | 2.417 (0.75)**  |
| Middle class-Higher status                                             |                 |                 |                 |                 | 1.840 (0.53)*   |
| Middle class-Middle status                                             |                 |                 |                 |                 | 1.402 (0.45)    |
| Middle class-Lower status                                              |                 |                 |                 |                 | 1.754 (0.50)*   |
| Working class-Higher status                                            |                 |                 |                 |                 | 0.987 (0.44)    |
| Working class-Middle status                                            |                 |                 |                 |                 | 1.814 (0.64)    |
| Working class-Lower status                                             |                 |                 |                 |                 | 1.647 (0.49)    |
| <b>Karlson, Holm, Breen-Mediation Analysis</b>                         |                 |                 |                 |                 |                 |
| <b>% of Material social class mediated by Subjective social status</b> |                 |                 |                 |                 |                 |
| Higher Class                                                           |                 | -               | -               |                 |                 |
| Middle Class                                                           |                 | 30.78%*         | 24.44%          |                 |                 |
| Working Class                                                          |                 | 110.20%**       | 71.34%          |                 |                 |

Source: Wave 2 and 6 of the English Longitudinal Study of Ageing ° p > 0.10 \* p < 0.05, \*\* p < 0.01, \*\*\* p < 0.001. Entries represent the results of separate logistic regression models
