# Supplementary material
Source: publisher figshare collection journal article supplement (https://plos.figshare.com/articles/dataset/_/7050239)
Supplement: Supplementary file 1 [file 1 › pone.0202489.s003.pdf]

As was the case in Study 1, confirmatory factor analysis on our index of unhealthy behavior shows that not all variables load in a single factor nor is there a clear structure of several underlying factors while the Cronbach's alpha is low at 0.20. Since this shows that the several forms of unhealthy behavior are not very related to each other, we present the following separate analyses further showing how material class and subjective social status are associated with several forms of behavior.

**S3 Table. Material Class and Subjective Social Status regressed on Unhealthy Behaviors including control variables**

| <b><i>Too little exercise (N: 6275)</i></b> | 1A                | 1B               | 1C               | 1D                | 1E                |
|---------------------------------------------|-------------------|------------------|------------------|-------------------|-------------------|
| <b>Constant</b>                             | 23.492 (10.38)*** | 13.311 (6.30)*** | 21.102 (9.61)*** | 44.526 (26.69)*** | 22.618 (10.36)*** |
| <b>Material Class</b>                       |                   |                  |                  |                   |                   |
| Administrative Class (Ref.)                 | -                 | -                | -                | -                 |                   |
| Professional/Executive Class                | 1.281 (0.13)*     | 1.014 (0.12)     | 1.020 (0.12)     | 0.436 (0.15)*     |                   |
| Clerical/Support Class                      | 1.868 (0.39)**    | 1.236 (0.28)     | 1.289 (0.29)     | 1.344 (1.108)     |                   |
| <b>Gender</b>                               |                   |                  |                  |                   |                   |
| Male (Ref.)                                 | -                 | -                | -                | -                 | -                 |
| Female                                      | 1.874 (0.25)***   | 1.918 (0.26)***  | 1.905 (0.26)***  | 1.904 (0.26)***   | 1.892 (0.26)***   |
| <b>Education</b>                            |                   |                  |                  |                   |                   |
| No post-secondary education (Ref.)          | -                 | -                | -                | -                 | -                 |
| Post-secondary education                    | 1.235 (0.13)*     | 1.349 (0.14)**   | 1.336 (0.14)**   | 1.307 (0.14)*     | 1.315 (0.14)*     |
| <b>Marital Status</b>                       |                   |                  |                  |                   |                   |
| Married (Ref.)                              | -                 | -                | -                | -                 | -                 |
| Not-married                                 | 1.219 (0.16)      | 1.152 (0.15)     | 1.165 (0.15)     | 1.148 (0.15)      | 1.159 (0.15)      |
| <b>Age</b>                                  | 0.979 (0.01)**    | 0.978 (0.01)**   | 0.978 (0.01)**   | 0.978 (0.01)**    | 0.978 (0.01)**    |
| <b>Decreasing Subjective Status</b>         |                   | 1.188 (0.04)***  |                  | 1.071 (0.05)      |                   |
| <b>Subjective Status Groups</b>             |                   |                  |                  |                   |                   |
| Higher status (Ref.)                        |                   |                  | -                |                   |                   |
| Middle status                               |                   |                  | 1.434 (0.16)**   |                   |                   |
| Lower status                                |                   |                  | 1.903 (0.28)***  |                   |                   |
| <b>Material Class X Subjective Status</b>   |                   |                  |                  |                   |                   |
| Administrative X Subj status (Ref.)         |                   |                  |                  | -                 |                   |
| Professional/Executive X Subj Status        |                   |                  |                  | 1.224 (0.09)**    |                   |
| Clerical/Support X Subj Status              |                   |                  |                  | 1.025 (0.14)      |                   |
| <b>Class-Status Combinations</b>            |                   |                  |                  |                   |                   |
| Administrative-Higher status (Ref.)         |                   |                  |                  |                   | -                 |
| Administrative-Middle status                |                   |                  |                  |                   | 1.391 (0.20)*     |
| Administrative-Lower status                 |                   |                  |                  |                   | 0.970 (0.22)      |
| Professional-Higher status                  |                   |                  |                  |                   | 0.769 (0.13)      |
| Professional-Middle status                  |                   |                  |                  |                   | 1.385 (0.20)*     |
| Professional-Lower status                   |                   |                  |                  |                   | 2.128 (0.35)***   |
| Clerical-Higher status                      |                   |                  |                  |                   | 3.015 (3.09)      |
| Clerical-Middle status                      |                   |                  |                  |                   | 1.294 (0.44)      |
| Clerical-Lower status                       |                   |                  |                  |                   | 2.463 (0.63)***   |



|                                                                                                                  |                 |                         |                       |                  |                 |
|------------------------------------------------------------------------------------------------------------------|-----------------|-------------------------|-----------------------|------------------|-----------------|
| % of Material social class mediated by Subjective social status<br>Higher Class<br>Middle Class<br>Working Class |                 | -<br>28.83%*<br>27.16%* | -<br>14.03%<br>12.19% |                  |                 |
| No daily consumption of fruits and vegetables (N: 6430)                                                          | 3A              | 3B                      | 3C                    | 3D               | 3E              |
| Constant                                                                                                         | 3.847 (1.11)*** | 1.893 (0.58)*           | 3.268 (0.97)***       | 11.837 (4.77)*** | 3.236 (0.97)*** |
| Material Class                                                                                                   |                 |                         |                       |                  |                 |
| Administrative Class (Ref.)                                                                                      | -               | -                       | -                     | -                |                 |
| Professional/Executive Class                                                                                     | 1.435 (0.10)*** | 1.106 (0.08)            | 1.124 (0.09)          | 0.842 (0.20)     |                 |
| Clerical/Support Class                                                                                           | 2.734 (0.30)*** | 1.772 (0.22)***         | 1.855 (0.22)***       | 2.222 (0.91)*    |                 |
| Gender                                                                                                           |                 |                         |                       |                  |                 |
| Male (Ref.)                                                                                                      | -               | -                       | -                     | -                | -               |
| Female                                                                                                           | 0.436 (0.03)*** | 0.442 (0.03)***         | 0.436 (0.03)***       | 0.440 (0.03)***  | 0.432 (0.03)*** |
| Education                                                                                                        |                 |                         |                       |                  |                 |
| No post-secondary education (Ref.)                                                                               | -               | -                       | -                     | -                | -               |
| Post-secondary education                                                                                         | 0.756 (0.05)*** | 0.820 (0.06)**          | 0.806 (0.06)**        | 0.815 (0.06)**   | 0.809 (0.06)**  |
| Marital Status                                                                                                   |                 |                         |                       |                  |                 |
| Married (Ref.)                                                                                                   | -               | -                       | -                     | -                | -               |
| Not-married                                                                                                      | 1.450 (0.10)*** | 1.349 (0.10)***         | 1.372 (0.10)***       | 1.349 (0.10)***  | 1.367 (0.10)*** |
| Age                                                                                                              | 0.957 0.00)***  | 0.957 (0.00)***         | 0.956 (0.00)***       | 0.957 (0.00)***  | 0.957 (0.00)*** |
| Decreasing Subjective Status                                                                                     |                 | 1.200 (0.03)***         |                       | 1.145 (0.03)***  |                 |
| Subjective Status Groups                                                                                         |                 |                         |                       |                  |                 |
| Higher status (Ref.)                                                                                             |                 |                         | -                     |                  |                 |
| Middle status                                                                                                    |                 |                         | 1.292 (0.10)**        |                  |                 |
| Lower status                                                                                                     |                 |                         | 1.959 (0.18)***       |                  |                 |
| Material Class X Subjective Status                                                                               |                 |                         |                       |                  |                 |
| Administrative X Subj status (Ref.)                                                                              |                 |                         |                       | -                |                 |
| Professional/Executive X Subj Status                                                                             |                 |                         |                       | 1.062 (0.05)     |                 |
| Clerical/Support X Subj Status                                                                                   |                 |                         |                       | 0.974 (0.07)     |                 |
| Class-Status Combinations                                                                                        |                 |                         |                       |                  |                 |
| Administrative-Higher status (Ref.)                                                                              |                 |                         |                       |                  | -               |
| Administrative-Middle status                                                                                     |                 |                         |                       |                  | 1.415 (0.14)**  |
| Administrative-Lower status                                                                                      |                 |                         |                       |                  | 1.556 (0.27)*   |
| Professional-Higher status                                                                                       |                 |                         |                       |                  | 1.116 (0.16)    |
| Professional-Middle status                                                                                       |                 |                         |                       |                  | 1.394 (0.14)**  |
| Professional-Lower status                                                                                        |                 |                         |                       |                  | 2.372 (0.23)*** |
| Clerical-Higher status                                                                                           |                 |                         |                       |                  | 3.822 (1.42)*** |
| Clerical-Middle status                                                                                           |                 |                         |                       |                  | 2.334 0.50)***  |
| Clerical-Lower status                                                                                            |                 |                         |                       |                  | 3.604 (0.47)*** |
| Karlson, Holm, Breen-Mediation Analysis                                                                          |                 |                         |                       |                  |                 |
| % of Material social class mediated by Subjective social status                                                  |                 |                         |                       |                  |                 |

|                                                                        |                 |                             |                             |                 |                 |
|------------------------------------------------------------------------|-----------------|-----------------------------|-----------------------------|-----------------|-----------------|
| Higher Class<br>Middle Class<br>Working Class                          |                 | -<br>70.29%***<br>41.55%*** | -<br>66.26%***<br>36.01%*** |                 |                 |
| <b>Smoking (N: 6467)</b>                                               | 4A              | 4B                          | 4C                          | 4D              | 4E              |
| <b>Constant</b>                                                        | 0.454 (0.19)    | 0.283 (0.12)**              | 0.362 (0.16)*               | 1.009 (0.62)    | 0.363 (0.16)*   |
| <b>Material Class</b>                                                  |                 |                             |                             |                 |                 |
| Administrative Class (Ref.)                                            | -               | -                           | -                           | -               |                 |
| Professional/Executive Class                                           | 1.510 (0.16)*** | 1.252 (0.14)*               | 1.254 (0.14)*               | 1.286 (0.45)    |                 |
| Clerical/Support Class                                                 | 2.403 (0.35)*** | 1.837 (0.30)***             | 1.939 (0.31)***             | 1.288 (0.68)    |                 |
| <b>Gender</b>                                                          |                 |                             |                             |                 |                 |
| Male (Ref.)                                                            | -               | -                           | -                           | -               | -               |
| Female                                                                 | 0.910 (0.09)    | 0.951 (0.10)                | 0.942 (0.10)                | 0.954 (0.09)    | 0.944 (0.10)    |
| <b>Education</b>                                                       |                 |                             |                             |                 |                 |
| No post-secondary education (Ref.)                                     | -               | -                           | -                           | -               | -               |
| Post-secondary education                                               | 0.579 (0.06)*** | 0.616 (0.07)***             | 0.621 (0.07)***             | 0.614 (0.09)*** | 0.621 (0.07)*** |
| <b>Marital Status</b>                                                  |                 |                             |                             |                 |                 |
| Married (Ref.)                                                         | -               | -                           | -                           | -               | -               |
| Not-married                                                            | 1.580 (0.15)*** | 1.509 (0.15)***             | 1.537 (0.15)***             | 1.507 (0.15)*** | 1.538 (0.15)*** |
| <b>Age</b>                                                             | 0.970 (0.01)*** | 0.970 (0.01)***             | 0.970 (0.01)***             | 0.970 (0.01)*** | 0.971 (0.01)*** |
| <b>Decreasing Subjective Status</b>                                    |                 | 1.131 (0.03)***             |                             | 1.106 (0.06)    |                 |
| <b>Subjective Status Groups</b>                                        |                 |                             |                             |                 |                 |
| Higher status (Ref.)                                                   |                 |                             | -                           |                 |                 |
| Middle status                                                          |                 |                             | 1.445 (0.18)**              |                 |                 |
| Lower status                                                           |                 |                             | 1.642 (0.23)***             |                 |                 |
| <b>Material Class X Subjective Status</b>                              |                 |                             |                             |                 |                 |
| Administrative X Subj status (Ref.)                                    |                 |                             |                             | -               |                 |
| Professional/Executive X Subj Status                                   |                 |                             |                             | 0.998 (0.07)    |                 |
| Clerical/Support X Subj Status                                         |                 |                             |                             | 1.062 (0.10)    |                 |
| <b>Class-Status Combinations</b>                                       |                 |                             |                             |                 |                 |
| Administrative-Higher status (Ref.)                                    |                 |                             |                             |                 | -               |
| Administrative-Middle status                                           |                 |                             |                             |                 | 1.441 (0.24)*   |
| Administrative-Lower status                                            |                 |                             |                             |                 | 1.609 (0.43)    |
| Professional-Higher status                                             |                 |                             |                             |                 | 1.286 (0.28)    |
| Professional-Middle status                                             |                 |                             |                             |                 | 1.816 (0.28)*** |
| Professional-Lower status                                              |                 |                             |                             |                 | 2.027 (0.32)*** |
| Clerical-Higher status                                                 |                 |                             |                             |                 | 1.364 (0.85)    |
| Clerical-Middle status                                                 |                 |                             |                             |                 | 2.693 (0.71)*** |
| Clerical-Lower status                                                  |                 |                             |                             |                 | 3.240 (0.58)*** |
| <b>Karlson, Holm, Breen-Mediation Analysis</b>                         |                 |                             |                             |                 |                 |
| <b>% of Material social class mediated by Subjective social status</b> |                 |                             |                             |                 |                 |
| Higher Class                                                           |                 | -                           | -                           |                 |                 |
| Middle Class                                                           |                 | 41.68%***                   | 39.53%**                    |                 |                 |
| Working Class                                                          |                 | 31.19%***                   | 27.00%**                    |                 |                 |

| <b>Alcohol Consumption (N: 6429)</b>                                   | 5A              | 5B              | 5C              | 5D              | 5E              |
|------------------------------------------------------------------------|-----------------|-----------------|-----------------|-----------------|-----------------|
| <b>Constant</b>                                                        | 2.702 (0.79)**  | 4.673 (1.46)*** | 3.612 (1.09)*** | 0.938 (0.37)    | 3.476 (1.05)*** |
| <b>Material Class</b>                                                  |                 |                 |                 |                 |                 |
| Administrative Class (Ref.)                                            | -               | -               | -               | -               |                 |
| Professional/Executive Class                                           | 0.763 (0.05)*** | 0.885 (0.06)    | 0.862 (0.06)*   | 0.642 (0.14)*   |                 |
| Clerical/Support Class                                                 | 0.354 (0.05)*** | 0.474 (0.08)*** | 0.431 (0.07)*** | 0.138 (0.09)**  |                 |
| <b>Gender</b>                                                          |                 |                 |                 |                 |                 |
| Male (Ref.)                                                            | -               | -               | -               | -               | -               |
| Female                                                                 | 0.308(0.03)***  | 0.301 (0.03)*** | 0.303 (0.03)*** | 0.303 (0.03)*** | 0.303 (0.03)*** |
| <b>Education</b>                                                       |                 |                 |                 |                 |                 |
| No post-secondary education (Ref.)                                     | -               | -               | -               | -               | -               |
| Post-secondary education                                               | 1.008 (0.07)    | 0.949 (0.06)    | 0.950 (0.06)    | 0.933 (0.06)    | 0.958 (0.07)    |
| <b>Marital Status</b>                                                  |                 |                 |                 |                 |                 |
| Married (Ref.)                                                         | -               | -               | -               | -               | -               |
| Not-married                                                            | 1.184 (0.09)*   | 1.226 (0.10)*   | 1.205 (0.10)*   | 1.221 (0.10)*   | 1.204 (0.10)*   |
| <b>Age</b>                                                             | 0.970 (0.00)*** | 0.968 (0.00)*** | 0.968 (0.00)*** | 0.968 (0.00)*** | 0.968 (0.00)*** |
| <b>Decreasing Subjective Status</b>                                    |                 | 0.894 (0.02)*** |                 | 0.821 (0.04)*** |                 |
| <b>Subjective Status Groups</b>                                        |                 |                 |                 |                 |                 |
| Higher status (Ref.)                                                   |                 |                 | -               |                 |                 |
| Middle status                                                          |                 |                 | 0.740 (0.05)*** |                 |                 |
| Lower status                                                           |                 |                 | 0.717 (0.07)*** |                 |                 |
| <b>Material Class X Subjective Status</b>                              |                 |                 |                 |                 |                 |
| Administrative X Subj status (Ref.)                                    |                 |                 |                 | -               |                 |
| Professional/Executive X Subj Status                                   |                 |                 |                 | 1.082 (0.05)    |                 |
| Clerical/Support X Subj Status                                         |                 |                 |                 | 1.249 (0.13)*   |                 |
| <b>Class-Status Combinations</b>                                       |                 |                 |                 |                 |                 |
| Administrative-Higher status (Ref.)                                    |                 |                 |                 |                 | -               |
| Administrative-Middle status                                           |                 |                 |                 |                 | 0.806 (0.07)*   |
| Administrative-Lower status                                            |                 |                 |                 |                 | 0.711 (0.12)*   |
| Professional-Higher status                                             |                 |                 |                 |                 | 1.001 (0.13)    |
| Professional-Middle status                                             |                 |                 |                 |                 | 0.632 (0.06)*** |
| Professional-Lower status                                              |                 |                 |                 |                 | 0.632 (0.06)*** |
| Clerical-Higher status                                                 |                 |                 |                 |                 | 0.416 (0.26)    |
| Clerical-Middle status                                                 |                 |                 |                 |                 | 0.247 (0.08)*** |
| Clerical-Lower status                                                  |                 |                 |                 |                 | 0.343 (0.06)*** |
| <b>Karlson, Holm, Breen-Mediation Analysis</b>                         |                 |                 |                 |                 |                 |
| <b>% of Material social class mediated by Subjective social status</b> |                 |                 |                 |                 |                 |
| Higher Class                                                           |                 | -               | -               |                 |                 |
| Middle Class                                                           |                 | 54.37%***       | 44.50%***       |                 |                 |
| Working Class                                                          |                 | 24.94%***       | 18.75%***       |                 |                 |

| <b>Wine Consumption (N: 6429)</b>                                      | 6A              | 6B              | 6B              | 6D              | 6E              |
|------------------------------------------------------------------------|-----------------|-----------------|-----------------|-----------------|-----------------|
| <b>Constant</b>                                                        | 0.096 (0.06)*** | 0.360 (0.23)    | 0.162 (0.10)**  | 0.007 (0.01)*** | 0.163 (0.10)**  |
| <b>Material Class</b>                                                  |                 |                 |                 |                 |                 |
| Administrative Class (Ref.)                                            | -               | -               | -               | -               | -               |
| Professional/Executive Class                                           | 0.470 (0.07)*** | 0.687 (0.11)*   | 0.618 (0.10)**  | 0.270 (0.13)**  |                 |
| Clerical/Support Class                                                 | 0.124 (0.05)*** | 0.242 (0.10)**  | 0.187 (0.08)*** | 0.009 (0.2)**   |                 |
| <b>Gender</b>                                                          |                 |                 |                 |                 |                 |
| Male (Ref.)                                                            | -               | -               | -               | -               | -               |
| Female                                                                 | 1.760 (0.25)*** | 1.656 (0.24)**  | 1.663 (0.25)**  | 1.660 (0.25)**  | 1.669 (0.24)**  |
| <b>Education</b>                                                       |                 |                 |                 |                 |                 |
| No post-secondary education (Ref.)                                     | -               | -               | -               | -               | -               |
| Post-secondary education                                               | 1.725 (0.23)*** | 1.424 (0.20)*   | 1.492 (0.21)**  | 1.375 (0.19)*   | 1.493 (0.21)**  |
| <b>Marital Status</b>                                                  |                 |                 |                 |                 |                 |
| Married (Ref.)                                                         | -               | -               | -               | -               | -               |
| Not-married                                                            | 0.781 (0.13)    | 0.900 (0.15)    | 0.865 (0.15)    | 0.888 (0.15)    | 0.862 (0.15)    |
| <b>Age</b>                                                             | 0.989 (0.01)    | 0.984 (0.01)    | 0.984 (0.01)    | 0.983 (0.01)    | 0.984 (0.01)    |
| <b>Decreasing Subjective Status</b>                                    |                 | 0.750 (0.04)*** |                 | 0.504 (0.11)*** |                 |
| <b>Subjective Status Groups</b>                                        |                 |                 |                 |                 |                 |
| Higher status (Ref.)                                                   |                 |                 | -               |                 |                 |
| Middle status                                                          |                 |                 | 0.578 (0.09)*** |                 |                 |
| Lower status                                                           |                 |                 | 0.506 (0.10)**  |                 |                 |
| <b>Material Class X Subjective Status</b>                              |                 |                 |                 |                 |                 |
| Administrative X Subj status (Ref.)                                    |                 |                 |                 | -               |                 |
| Professional/Executive X Subj Status                                   |                 |                 |                 | 1.265 (0.14)*   |                 |
| Clerical/Support X Subj Status                                         |                 |                 |                 | 1.834 (0.51)*   |                 |
| <b>Class-Status Combinations</b>                                       |                 |                 |                 |                 |                 |
| Administrative-Higher status (Ref.)                                    |                 |                 |                 |                 | -               |
| Administrative-Middle status                                           |                 |                 |                 |                 | 0.596 (0.10)**  |
| Administrative-Lower status                                            |                 |                 |                 |                 | 0.329 (0.14)**  |
| Professional-Higher status                                             |                 |                 |                 |                 | 0.598 (0.15)*   |
| Professional-Middle status                                             |                 |                 |                 |                 | 0.351 (0.07)*** |
| Professional-Lower status                                              |                 |                 |                 |                 | 0.318 (0.07)*** |
| Clerical-Higher status                                                 |                 |                 |                 |                 | -               |
| Clerical-Middle status                                                 |                 |                 |                 |                 | -               |
| Clerical-Lower status                                                  |                 |                 |                 |                 | 0.139 (0.06)*** |
| <b>Karlson, Holm, Breen-Mediation Analysis</b>                         |                 |                 |                 |                 |                 |
| <b>% of Material social class mediated by Subjective social status</b> |                 |                 |                 |                 |                 |
| Higher Class                                                           |                 | -               | -               |                 |                 |
| Middle Class                                                           |                 | 49.39%***       | 35.26%***       |                 |                 |
| Working Class                                                          |                 | 31.00%***       | 20.18%***       |                 |                 |
| <b>Beer Consumption (N: 6429)</b>                                      | 7A              | 7B              | 7C              | 7D              | 7E              |

|                                                                        |                 |                 |                 |                 |                 |
|------------------------------------------------------------------------|-----------------|-----------------|-----------------|-----------------|-----------------|
| <b>Constant</b>                                                        | 1.744 (1.28)    | 1.896 (1.48)    | 1.692 (1.28)    | 1.361 (1.39)    | 1.666 (1.27)    |
| <b>Material Class</b>                                                  |                 |                 |                 |                 |                 |
| Administrative Class (Ref.)                                            | -               | -               | -               | -               | -               |
| Professional/Executive Class                                           | 1.440 (0.23)*   | 1.625 (0.29)**  | 1.646 (0.29)**  | 2.124 (1.12)    |                 |
| Clerical/Support Class                                                 | 0.781 (0.29)    | 0.974 (0.39)    | 0.971 (0.39)    | 1.222 (2.01)    |                 |
| <b>Gender</b>                                                          |                 |                 |                 |                 |                 |
| Male (Ref.)                                                            | -               | -               | -               | -               | -               |
| Female                                                                 | 0.009 (0.01)*** | 0.009 (0.01)*** | 0.010 (0.01)*** | 0.010 (0.01)*** | 0.010 (0.01)*** |
| <b>Education</b>                                                       |                 |                 |                 |                 |                 |
| No post-secondary education (Ref.)                                     | -               | -               | -               | -               | -               |
| Post-secondary education                                               | 0.663 (0.11)*   | 0.677 (0.11)*   | 0.674 (0.12)*   | 0.684 (0.12)*   | 0.680 (0.12)*   |
| <b>Marital Status</b>                                                  |                 |                 |                 |                 |                 |
| Married (Ref.)                                                         | -               | -               | -               | -               | -               |
| Not-married                                                            | 2.669 (0.42)*** | 2.705 (0.44)*** | 2.701 (0.44)*** | 2.707 (0.44)*** | 2.691 (0.44)*** |
| <b>Age</b>                                                             | 0.932 (0.01)*** | 0.934 (0.01)*** | 0.933 (0.01)*** | 0.934 (0.01)*** | 0.933 (0.01)*** |
| <b>Decreasing Subjective Status</b>                                    |                 | 0.942 (0.05)    |                 | 0.985 (0.10)    |                 |
| <b>Subjective Status Groups</b>                                        |                 |                 |                 |                 |                 |
| Higher status (Ref.)                                                   |                 |                 | -               |                 |                 |
| Middle status                                                          |                 |                 | 0.834 (0.15)    |                 |                 |
| Lower status                                                           |                 |                 | 0.766 (0.17)    |                 |                 |
| <b>Material Class X Subjective Status</b>                              |                 |                 |                 |                 |                 |
| Administrative X Subj status (Ref.)                                    |                 |                 |                 | -               |                 |
| Professional/Executive X Subj Status                                   |                 |                 |                 | 0.937 (0.11)    |                 |
| Clerical/Support X Subj Status                                         |                 |                 |                 | 0.947 (0.25)    |                 |
| <b>Class-Status Combinations</b>                                       |                 |                 |                 |                 |                 |
| Administrative-Higher status (Ref.)                                    |                 |                 |                 |                 | -               |
| Administrative-Middle status                                           |                 |                 |                 |                 | 0.902 (0.23)    |
| Administrative-Lower status                                            |                 |                 |                 |                 | 0.890 (0.40)    |
| Professional-Higher status                                             |                 |                 |                 |                 | 1.892 (0.53)*   |
| Professional-Middle status                                             |                 |                 |                 |                 | 1.335 (0.31)    |
| Professional-Lower status                                              |                 |                 |                 |                 | 1.358 (0.32)    |
| Clerical-Higher status                                                 |                 |                 |                 |                 | -               |
| Clerical-Middle status                                                 |                 |                 |                 |                 | 2.038 (1.16)    |
| Clerical-Lower status                                                  |                 |                 |                 |                 | 0.546 (0.27)    |
| <b>Karlson, Holm, Breen-Mediation Analysis</b>                         |                 |                 |                 |                 |                 |
| <b>% of Material social class mediated by Subjective social status</b> |                 |                 |                 |                 |                 |
| Higher Class                                                           |                 | -               | -               |                 |                 |
| Middle Class                                                           |                 | -19.05%         | -21.72%         |                 |                 |
| Working Class                                                          |                 | 83.33%          | 86.83%          |                 |                 |

Source: Wave 5 of the Whitehall II Study ° p > 0.10 \* p < 0.05, \*\* p < 0.01, \*\*\* p < 0.001. Entries represent the results of separate fixed effects logistic regression models
